# Supplementary material for: Tumor Cells and the Extracellular Matrix Dictate the Pro-Tumoral Profile of Macrophages in CRC
Source: MDPI journal article supplement (doi:10.3390/cancers13205199), 2021-10-16
Supplement: s1 [file s1]

**Figure S1**

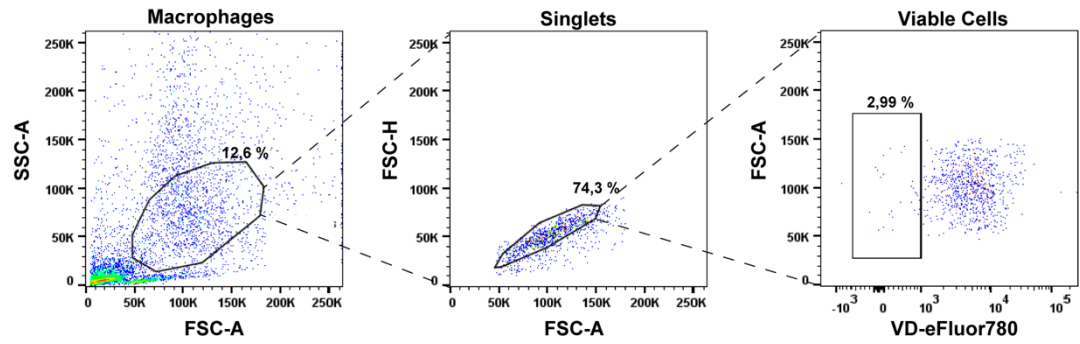

**Figure S1. Representative cytograms of untreated monocytes.**  $2 \times 10^6$  monocytes from healthy donors were plated in 24-w plates and cultured in DMEM 10% human serum (HS), 4 mM Hepes, and 50  $\mu\text{g/mL}$  gentamycin. After 5 d cells were harvested and analyzed by flow cytometry. Monocytes-differentiated macrophages population was first gated based on the FSC-A and SSC-A; then, single cells were gated based on FSC-A and FSC-H and dead cells were excluded using the fixable cell viability dye (VD) eFluor780. The population of viable cells is insufficient to proceed with the analysis of CD14 and CD68 expression.

Figure S2

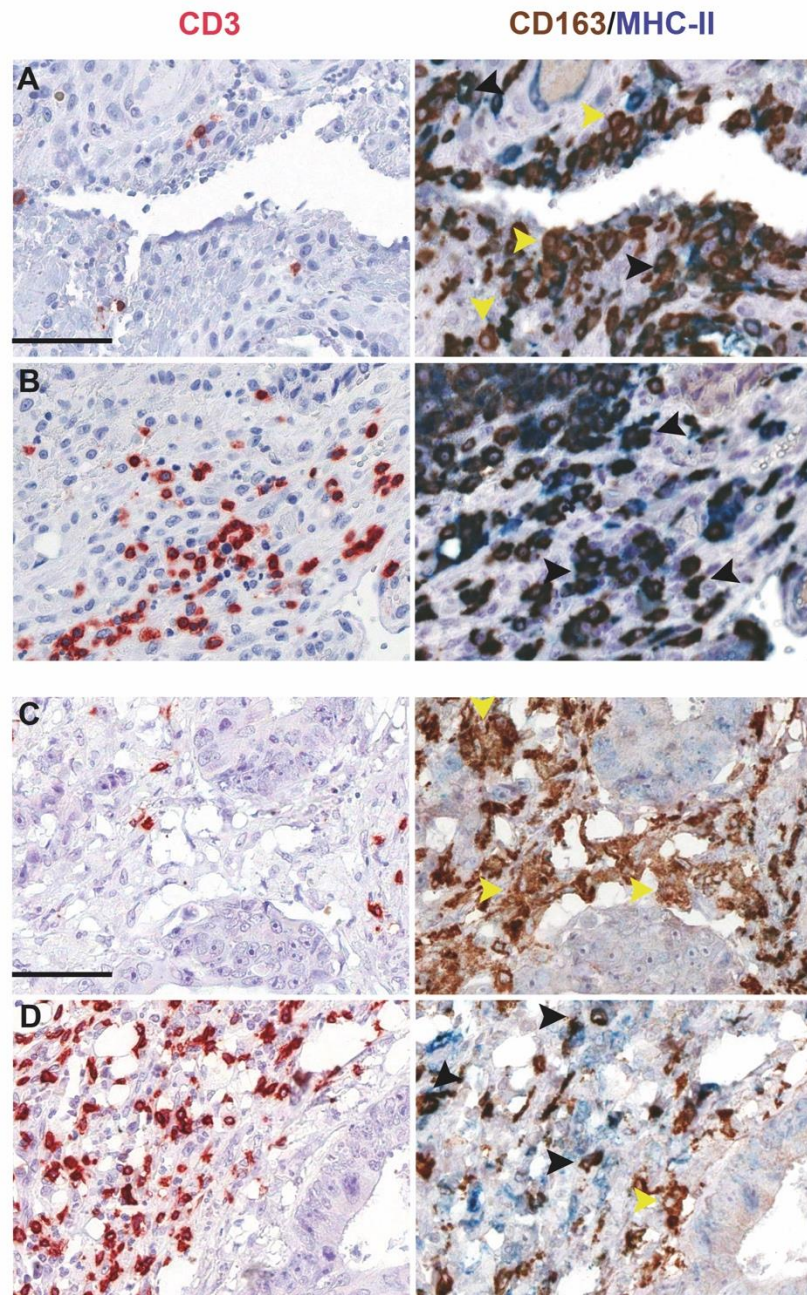

**Figure S2. A higher number of MHC-II<sup>dim/-</sup> CD163<sup>+</sup> macrophages correlate with a lower number of CD3<sup>+</sup> T cells infiltrating tumor areas in CRC.** Sequential immunostainings for CD3, MHC-II and CD163 were performed in CRC cases (n=8). CD3 was developed in Aminoethylcarbazole (AEC) whereas MHC-II in Ferangi Blue and CD163 in DAB (as labelled). Two representative CRC cases (A and B single case, C and D single case) show areas enriched in CD163<sup>+</sup> MHC-II<sup>dim/-</sup> macrophages (yellow arrows) characterized by a low density of CD3<sup>+</sup> T cells, and areas enriched in CD163<sup>+</sup> MHC-II<sup>+</sup>

macrophages (black arrows) with numerous CD3<sup>+</sup> T cells. Images were taken as snapshot from digitalized slides at 400x of magnification, scale bar 66  $\mu$ m.

**Figure S3**  
**a**

**5d IEC**

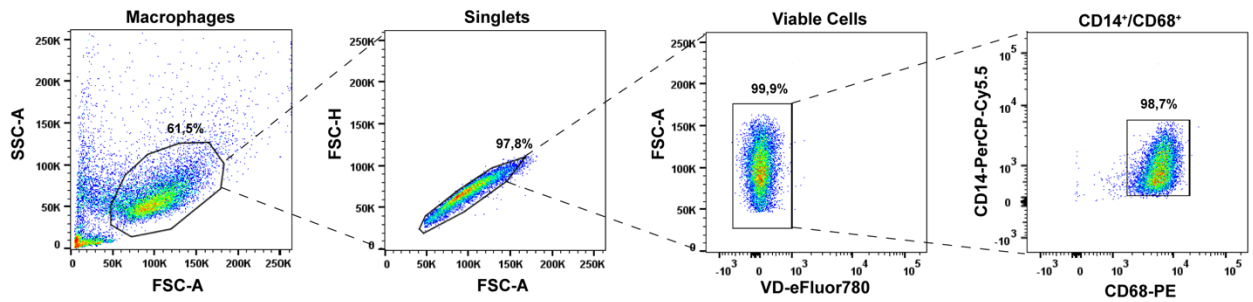

**5d CRC**

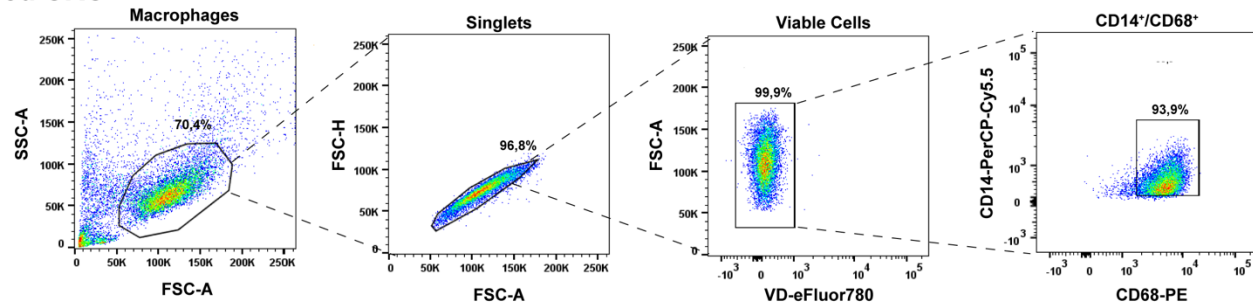

**b**

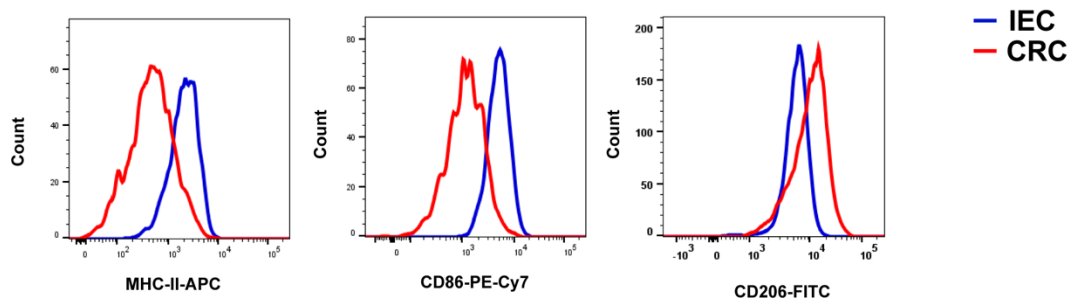

**Figure S3. Examples of the flow cytometric gating strategy adopted for data analysis.** Monocytes from healthy donors were plated on the bottom chamber of a transwell system and co-cultured with normal human intestinal epithelial cells (IEC) or colon cancer cells (CRC) plated onto the upper chamber. (a) After 5d co-culture, monocytes differentiated into macrophages in both conditions, IEC (middle panel) and CRC (lower panel), as demonstrated by the bigger morphology of the cells and by the expression of CD14/CD68 with respect to T<sub>0</sub> (upper panel), cells were harvested from the bottom chamber and analyzed by flow cytometry according to the following gating strategy. Monocytes-differentiated macrophages population was first gated based on the FSC-A and SSC-A, then, single cells were gated based on FSC-A and FSC-H and dead cells were excluded using the fixable cell viability dye (VD) eFluor780. Macrophages were further gated based on CD14 and CD68 expression. (b) The subpopulations of CD14<sup>+</sup>/CD68<sup>+</sup> live cells were analyzed for the expression of MHC-II, CD86 and CD206 as indicated in the representative histograms. The expression of these markers has been compared between macrophages co-cultured with IEC (blu) and CRC (red). The same gating strategy was used in all the experiments aimed at defining monocytes/macrophages profile.

Figure S4

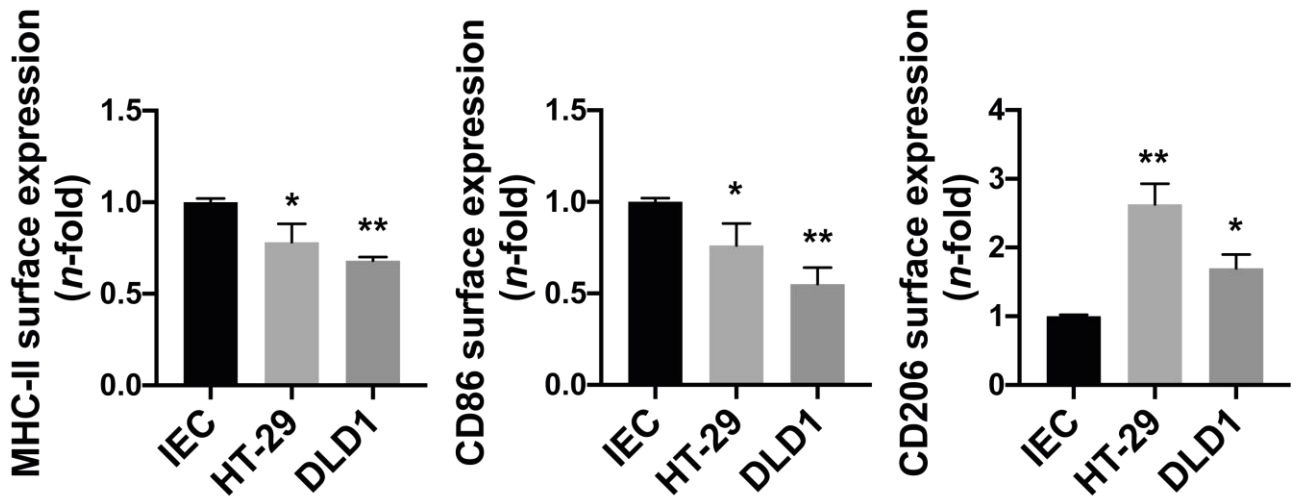

**Figure S4. Profile of monocyte-differentiated macrophages co-cultured with tumor cells.** Monocytes from healthy donors were plated on the bottom chamber of a transwell system and co-cultured with normal human intestinal epithelial cells (IEC) or HT-29 and DLD1 colon cancer cells plated onto the upper chamber. After 5 d cells were harvested from the bottom chamber and analyzed by flow cytometry for the expression of MHC-II, CD86, and CD206 gated on CD68<sup>+</sup> cells. Data are expressed as *n*-fold vs. IEC  $\pm$  SEM of seven independent experiments from seven different donors. Significance was determined by Student's *t* test. \**p* < 0.05, \*\**p* < 0.01.

Figure S5

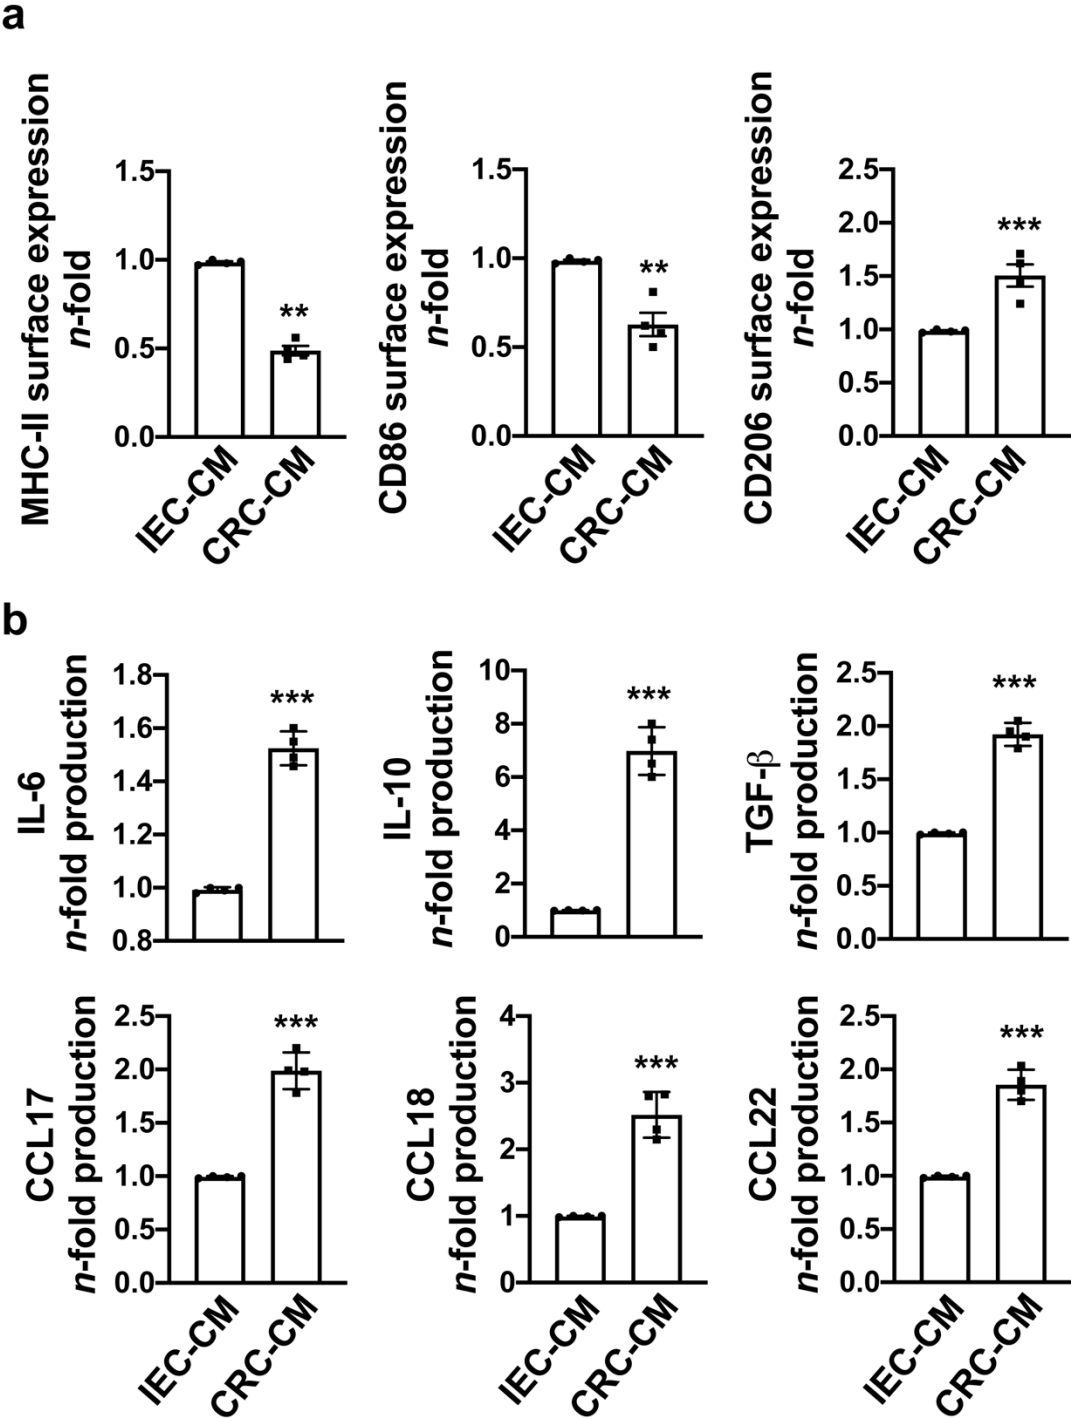

**Figure S5. Conditioned medium from colorectal cancer cells promotes monocytes differentiation towards a pro-tumoral macrophages like-profile.** (a)  $2 \times 10^6$  monocytes from healthy donors were plated in 24-w plate and stimulated with 15% of normal intestinal cells (IEC) or HCT116 (CRC) conditioned media (CM). After 5 d cells were harvested and analyzed by flow cytometry for the expression of MHC-II, CD86 and CD206 gated on CD68<sup>+</sup> cells. Data are expressed as *n*-fold vs IEC-CM,  $\pm$  SEM of 4 independent experiments from 4 different donors. (b) Culture supernatants from the above cells were harvested and IL-6, IL-10, TGF- $\beta$ , CCL17, CCL18, and CCL22 released were quantified by ELISA assay. Data are expressed as *n*-fold vs IEC-CM,  $\pm$  SEM of 4 independent experiments from 4 different donors. Significance was determined by Student's *t*-test \*\**p* < 0.01, \*\*\**p* < 0.001.

**Figure S6**

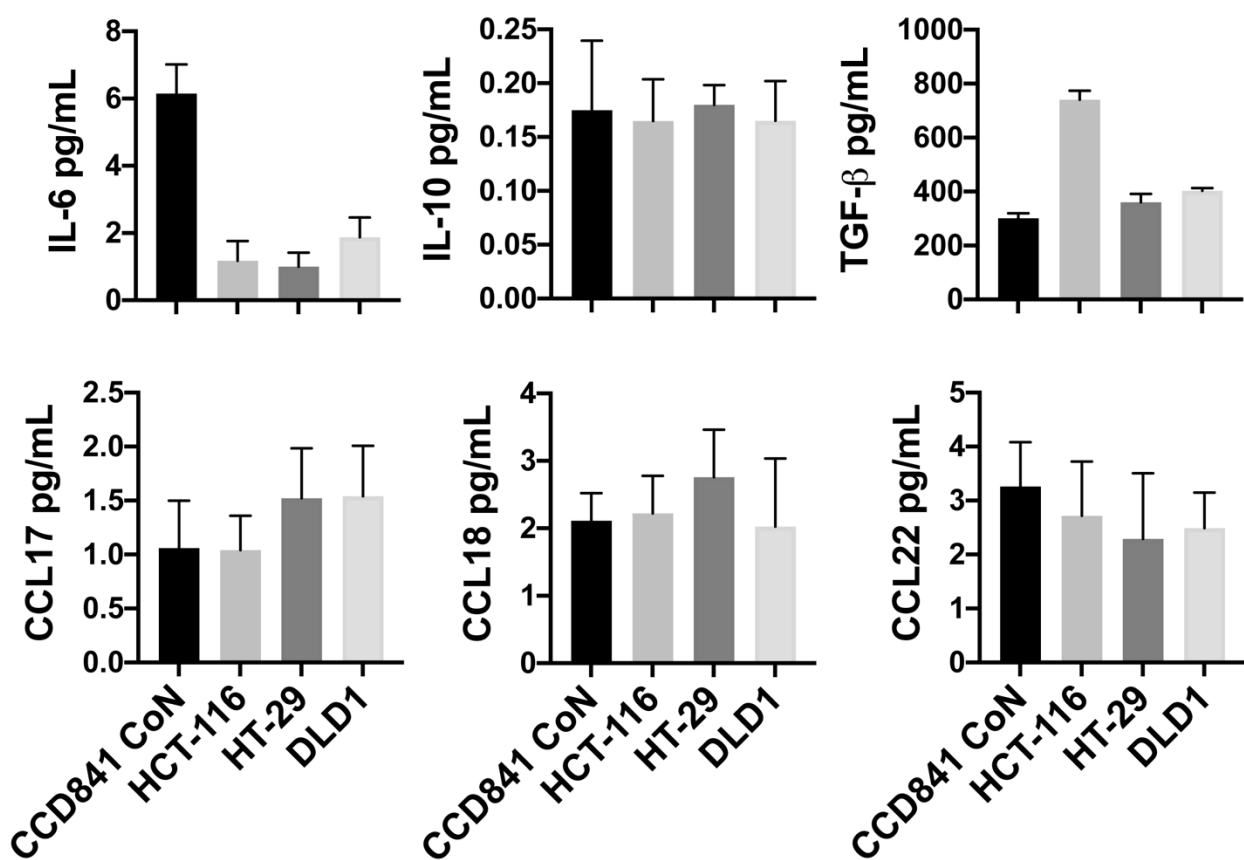

**Figure S6. Cytokines and chemokines in conditioned media from colorectal cancer cells.** Culture media from CCD841 CoN, HCT-116, HT-29 and DLD1 cells were harvested and IL-6, IL-10, TGF- $\beta$ , CCL17, CCL18, and CCL22 released were quantified by ELISA assay. Data are expressed as pg/mL.

Figure S7

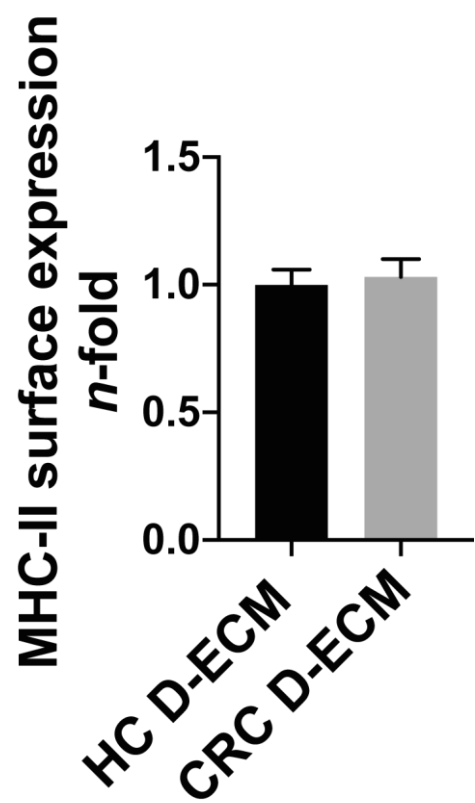

**Figure S7. Conditioned media from D-ECM does not affect MHC-II surface expression.** Normal decellularized matrix (HC D-ECM) and matched tumor decellularized matrix (CRC D-ECM) were maintained in DMEM 10% HS for 3 d. D-ECM conditioned media were then applied to monocytes cultures for 3 d. Cells were harvested and analyzed by flow cytometry for the expression of MHC-II gated on CD14<sup>+</sup>/CD68<sup>+</sup> cells. Data are expressed as *n*-fold *vs* Normal D-ECM of each patient  $\pm$  SD on 4 patients.

Figure S8

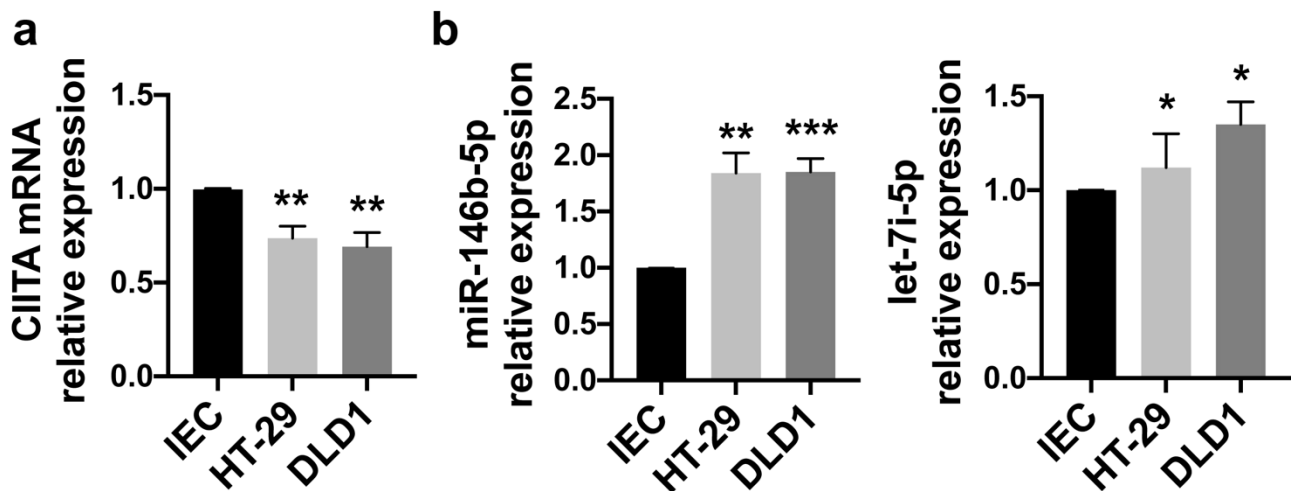

**Figure S8. Expression of CIITA, miR-146b-5p and let-7i-5p in monocyte-derived macrophages.** Monocytes from healthy donors were seeded on the bottom chamber of a transwell system and co-cultured with normal human intestinal epithelial cells (IEC; control cells) or HT-29 and DLD1 colon cancer cells seeded onto the upper chamber. After 5 d, cells were harvested from the bottom chamber and the expression of CIITA mRNA was analyzed by qRT-PCR. Data were normalized to the endogenous reference gene  $\beta$ -actin (left panel). The relative expression of miR-146b-5p and let-7i-5p were evaluated and data were normalized to an endogenous reference gene (U6). Values of macrophages cultured with control cells were taken as the reference and set as 1; the expression of macrophages cultured with CRC cells was relative to the expression of control cells (right panel). Significance was determined by Student's *t* test. \* $p < 0.05$  and \*\*\* $p < 0.001$ .

Figure S9

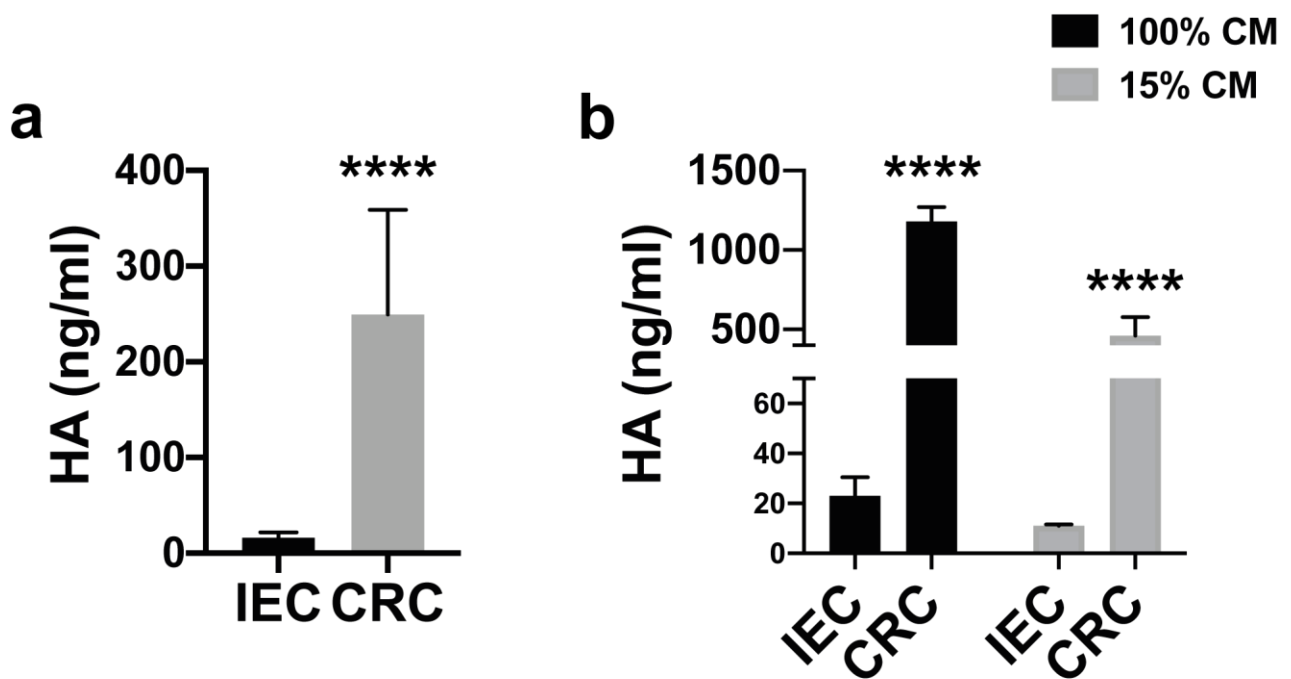

**Figure S9. HA quantification in monocytes co-cultured with tumor cells and in HCT116 conditioned medium.** (a) Monocytes from healthy donors were plated on the bottom chamber of the transwell system and co-cultured with normal intestinal cells (IEC) or HCT116 (CRC) plated onto the upper chamber. After 5 d, culture supernatants were harvested and HA in culture supernatants was quantified by ELISA assay. Data are expressed as ng/ml,  $\pm$  SEM of 7 independent experiments from 7 different donors. (b) HA was quantified in normal intestinal cells (IEC) and HCT116 (CRC) conditioned media 100% and diluted to the 15% (concentration adopted to stimulate monocytes). Significance was determined by Student's t-test and two-way ANOVA \*\*\*\* $p < 0.0001$ .

**Supplementary Table SI**

|                            |         | <b>Median Fluorescence Intensity (MFI)</b> |             |              |
|----------------------------|---------|--------------------------------------------|-------------|--------------|
|                            |         | <b>MHC-II</b>                              | <b>CD86</b> | <b>CD206</b> |
| <b>IEC (CCD841 CoN)</b>    | Donor 1 | 6418                                       | 2588        | 1621         |
|                            | Donor 2 | 12027                                      | 6892        | 3259         |
|                            | Donor 3 | 5018                                       | 4010        | 2616         |
|                            | Donor 4 | 2111                                       | 4575        | 2558         |
|                            | Donor 5 | 5521                                       | 4228        | 2781         |
|                            | Donor 6 | 6334                                       | 5577        | 5992         |
|                            | Donor 7 | 9751                                       | 2132        | 1636         |
| <b>CRC (HCT-116)</b>       | Donor 1 | 4364                                       | 2485        | 3566         |
|                            | Donor 2 | 2165                                       | 1585        | 5540         |
|                            | Donor 3 | 2560                                       | 922         | 5232         |
|                            | Donor 4 | 1647                                       | 3065        | 4860         |
|                            | Donor 5 | 4306                                       | 2114        | 4172         |
|                            | Donor 6 | 4371                                       | 2677        | 12703        |
|                            | Donor 7 | 5656                                       | 1322        | 2814         |
| <b>IEC-CM (CCD841 CoN)</b> | Donor 1 | 13033                                      | 3561        | 3972         |
|                            | Donor 2 | 10723                                      | 2568        | 4231         |
|                            | Donor 3 | 5964                                       | 3028        | 5486         |
|                            | Donor 4 | 7284                                       | 3052        | 5204         |
| <b>CRC-CM (HCT-116)</b>    | Donor 1 | 7310                                       | 2208        | 6792         |

|                  |         |       |       |       |
|------------------|---------|-------|-------|-------|
|                  | Donor 2 | 5254  | 1284  | 6851  |
|                  | Donor 3 | 2629  | 1754  | 7957  |
|                  | Donor 4 | 3350  | 2495  | 6453  |
| <b>HC D-ECM</b>  | Pt 1    | 3649  | 6054  | 1063  |
|                  | Pt 2    | 5792  | 26206 | 2920  |
|                  | Pt 3    | 5585  | 21167 | 4256  |
|                  | Pt 4    | 4483  | 22190 | 3510  |
|                  | Pt 5    | 1452  | 11108 | 1308  |
|                  | Pt 6    | 8392  | 24104 | 4490  |
|                  | Pt 7    | 7579  | 19185 | 3406  |
|                  | Pt 8    | 10747 | 20715 | 3643  |
| <b>CRC D-ECM</b> | Pt 1    | 2558  | 1065  | 1983  |
|                  | Pt 2    | 4196  | 20282 | 5921  |
|                  | Pt 3    | 3498  | 18110 | 5408  |
|                  | Pt 4    | 2323  | 15030 | 4225  |
|                  | Pt 5    | 1014  | 8736  | 1942  |
|                  | Pt 6    | 5533  | 18941 | 6335  |
|                  | Pt 7    | 3450  | 18633 | 11693 |
|                  | Pt 8    | 6083  | 17862 | 6045  |

Flow cytometry Median Fluorescence Intensity (MFI) raw data referred to Figures 2, 4 and Supplementary Figure S3.

## Supplementary Table SII

|                         |         | Cytokines and chemokines concentrations (pg/mL) |         |              |         |         |        |
|-------------------------|---------|-------------------------------------------------|---------|--------------|---------|---------|--------|
|                         |         | IL-6                                            | IL-10   | TGF- $\beta$ | CCL-17  | CCL-18  | CCL-22 |
| <b>IEC (CCD841 CoN)</b> | Donor 1 | 4061,48                                         | 214,73  | 1065,29      | 398,32  | 252,75  | 223,82 |
|                         | Donor 2 | 663,41                                          | 215,7   | 608,7        | 1449,56 | 1225,21 | 359,64 |
|                         | Donor 3 | 966,51                                          | 66,93   | 527,38       | 137,6   | 437,57  | 380,29 |
|                         | Donor 4 | 404,12                                          | 132,11  | 294,67       | 361,54  | 599,75  | 262,45 |
|                         | Donor 5 | 187,06                                          | 53,97   | 908,36       | 377,68  | 191,15  | 156,03 |
|                         | Donor 6 | 888,01                                          | 94,03   | 403,09       | 175,67  | 880,51  | 107,83 |
|                         | Donor 7 | 284,98                                          | 44,34   | 1088,84      | 198     | 302,63  | 480,01 |
| <b>CRC (HCT-116)</b>    | Donor 1 | 7147,4                                          | 2104,38 | 2335,12      | 873,11  | 964,71  | 455,22 |
|                         | Donor 2 | 966,51                                          | 2264,91 | 1350,1       | 3215,12 | 2424,27 | 969,9  |
|                         | Donor 3 | 2815,84                                         | 736,32  | 1123,32      | 293,09  | 1225,21 | 907,11 |
|                         | Donor 4 | 802,43                                          | 1585,34 | 804,46       | 987,01  | 1619,34 | 626,02 |
|                         | Donor 5 | 379,54                                          | 464,17  | 2780,5       | 1156,1  | 539,8   | 359,2  |

|                                    |         |         |        |         |         |         |         |
|------------------------------------|---------|---------|--------|---------|---------|---------|---------|
|                                    | Donor 6 | 1801,7  | 1316,5 | 994,04  | 433,21  | 2060,4  | 263,07  |
|                                    | Donor 7 | 544,32  | 394,21 | 2776,55 | 489,06  | 805,01  | 1022,43 |
| <b>IEC-CM<br/>(CCD841<br/>CoN)</b> | Donor 1 | 566,17  | 384,28 | 1164,9  | 169,14  | 476,63  | 175,42  |
|                                    | Donor 2 | 386,29  | 168,21 | 998,89  | 329,17  | 395,09  | 463,78  |
|                                    | Donor 3 | 238,69  | 102,38 | 474,2   | 606,12  | 206,52  | 238,45  |
|                                    | Donor 4 | 806,76  | 109,87 | 619,99  | 117,22  | 696,35  | 471,3   |
| <b>CRC-CM<br/>(HCT-116)</b>        | Donor 1 | 877,56  | 2305,7 | 2213,4  | 334,89  | 1334,55 | 356,77  |
|                                    | Donor 2 | 562,78  | 1244,7 | 1788    | 655,04  | 908,7   | 834,8   |
|                                    | Donor 3 | 381,91  | 665,47 | 972,1   | 1078,9  | 444,01  | 450,67  |
|                                    | Donor 4 | 1202,07 | 878,99 | 1208,99 | 257,89  | 1966,4  | 801,21  |
| <b>HC D-ECM</b>                    | Pt 1    | 275,66  | 433,98 | 1615,7  | 374,55  | 2023,33 | 238,2   |
|                                    | Pt 2    | 116,72  | 127,6  | 671,09  | 398,0   | 239,68  | 174,6   |
|                                    | Pt 3    | 154,42  | 242,9  | 1608,7  | 1076,23 | 1089,7  | 259,82  |
|                                    | Pt 4    | 655,07  | 465,57 | 679,77  | 585,3   | 285,93  | 538,83  |
|                                    | Pt 5    | 1077,96 | 481,09 | 1257,77 | 716,31  | 912,1   | 841,01  |
|                                    | Pt 6    | 854,1   | 1071,6 | 622,96  | 232,19  | 1216,09 | 778,66  |
|                                    | Pt 7    | 948,43  | 720    | 937,75  | 283,2   | 1166    | 589     |
|                                    | Pt 8    | 1188,88 | 503    | 1000,5  | 192,03  | 986,16  | 894     |
| <b>CRC D-ECM</b>                   | Pt 1    | 485,1   | 512,1  | 1809,55 | 466,4   | 2968,63 | 359,15  |
|                                    | Pt 2    | 443,55  | 167,9  | 794,57  | 557     | 331,68  | 274,8   |
|                                    | Pt 3    | 224,97  | 399,09 | 2302,1  | 1540    | 1751,65 | 549,2   |
|                                    | Pt 4    | 3289    | 1528,9 | 933,32  | 780     | 718,67  | 1167    |
|                                    | Pt 5    | 3361,35 | 949,5  | 1544,44 | 1238    | 1056,26 | 982,2   |
|                                    | Pt 6    | 1322,06 | 1427,2 | 688,99  | 275     | 1455,51 | 979,05  |
|                                    | Pt 7    | 6021,67 | 1296   | 2008,66 | 354     | 1410,86 | 706,8   |
|                                    | Pt 8    | 4161,08 | 995,94 | 1350,62 | 265     | 1331,32 | 1117,5  |

Cytokines and chemokines concentration (pg/mL) detected in culture supernatants from monocytes co-culture with i) normal intestinal cells (CCD841 CoN) or CRC cells (HCT-116), ii) stimulated with conditioned media (CM) from normal intestinal cells (CCD841 CoN) or CRC cells (HCT-116) or iii) co-cultured with normal (HC) or tumor (CRC) decellularized matrices (D-ECM).
